# Supplementary material
Source: publisher site journal article supplement (https://static.cambridge.org/content/id/urn:cambridge.org:id:article:S003382222000123X/resource/name/S003382222000123Xsupp004.pdf)

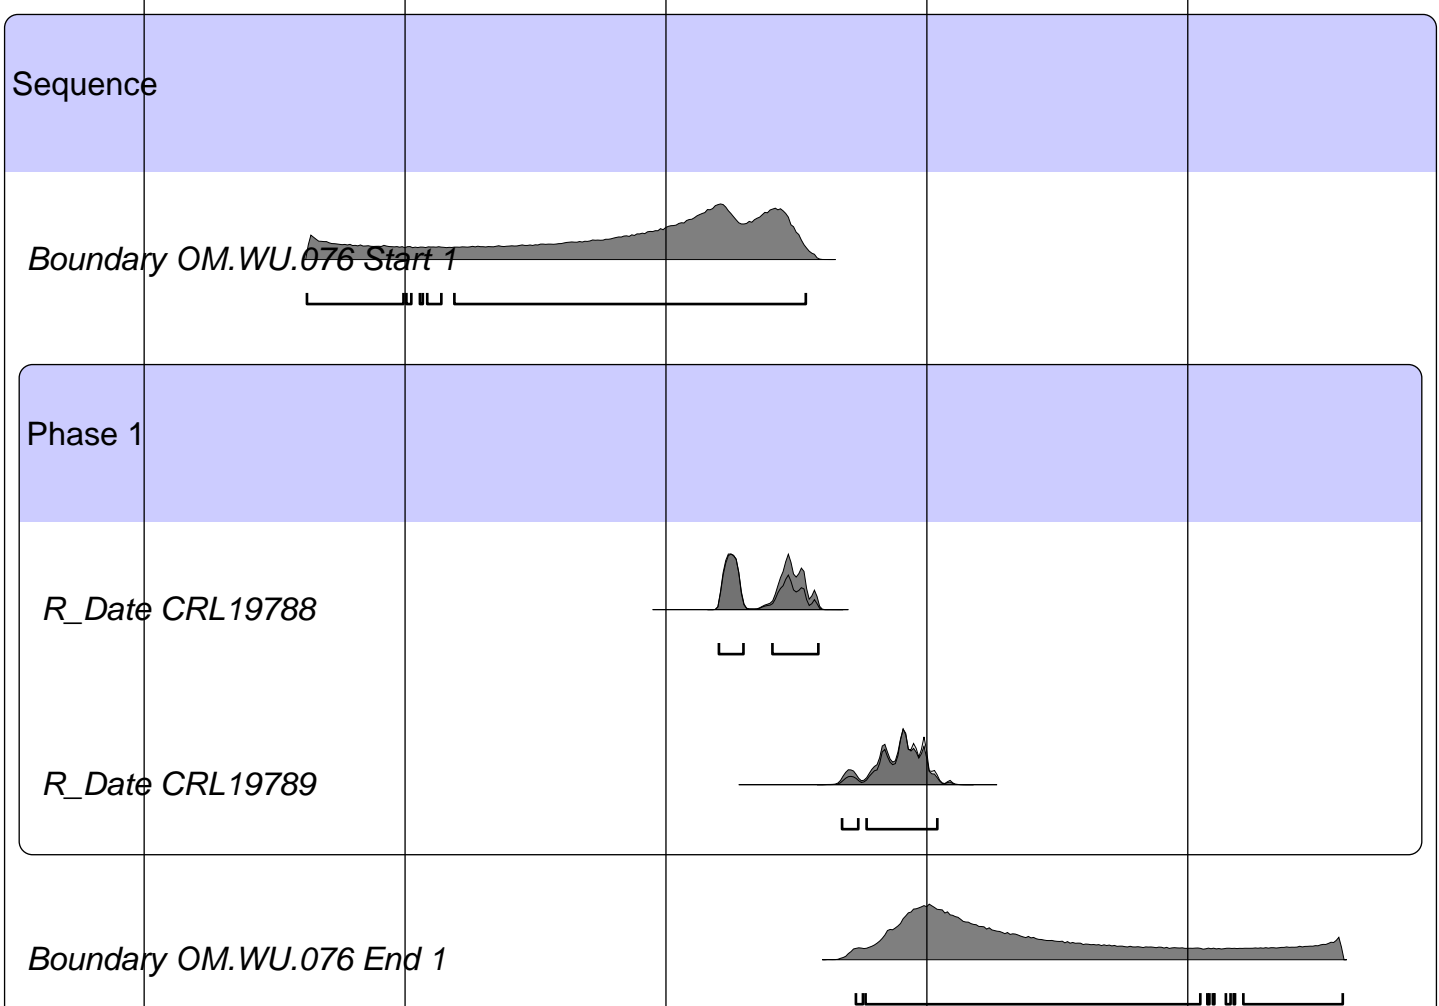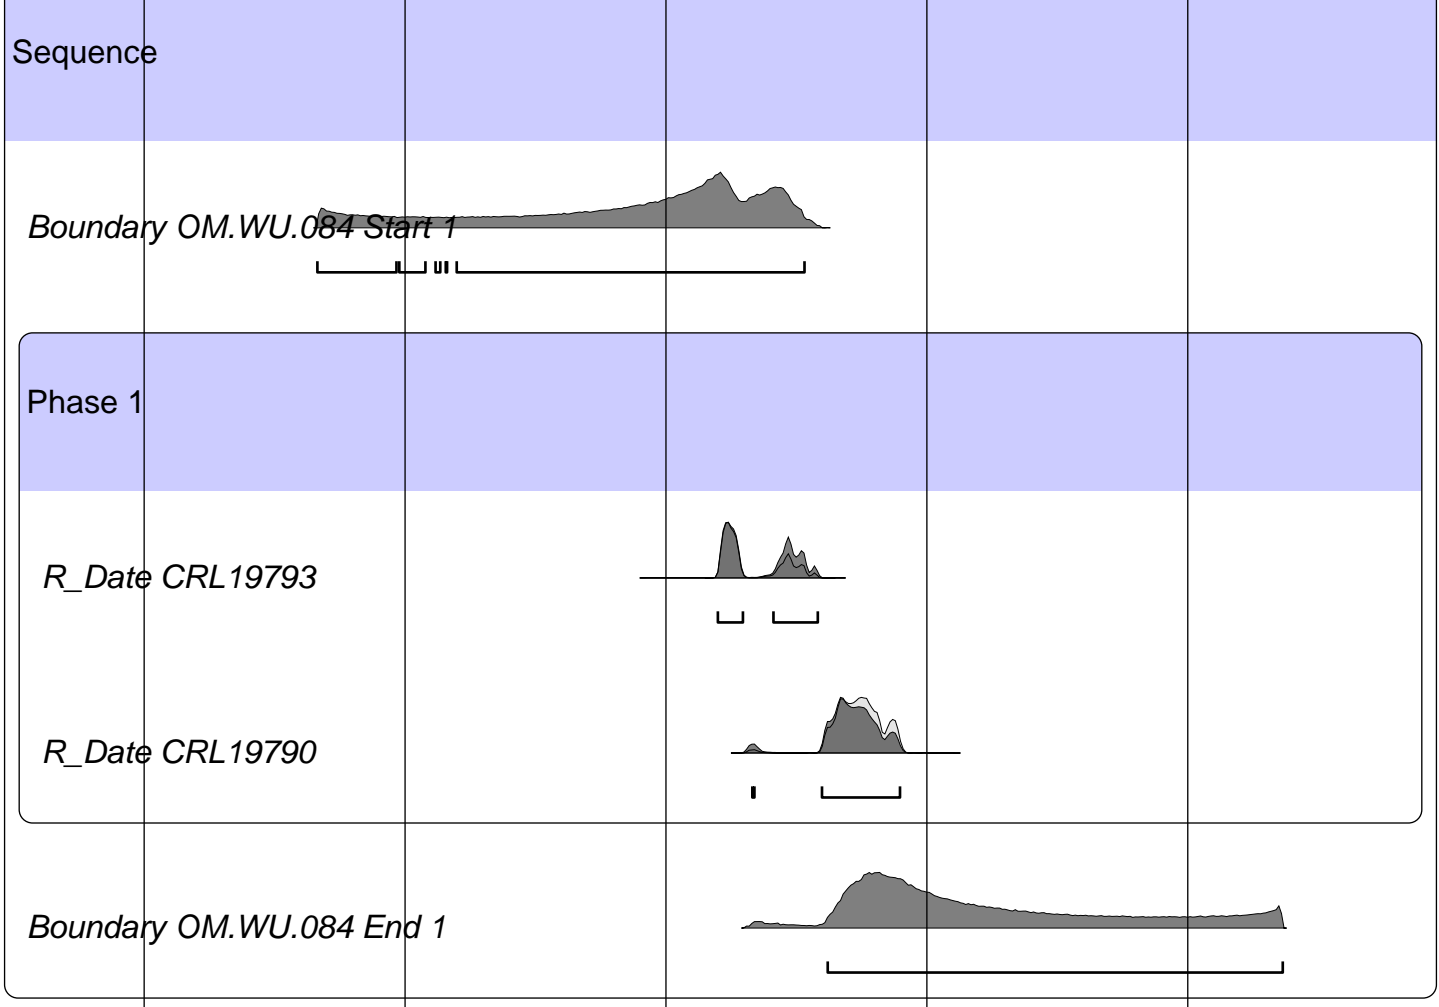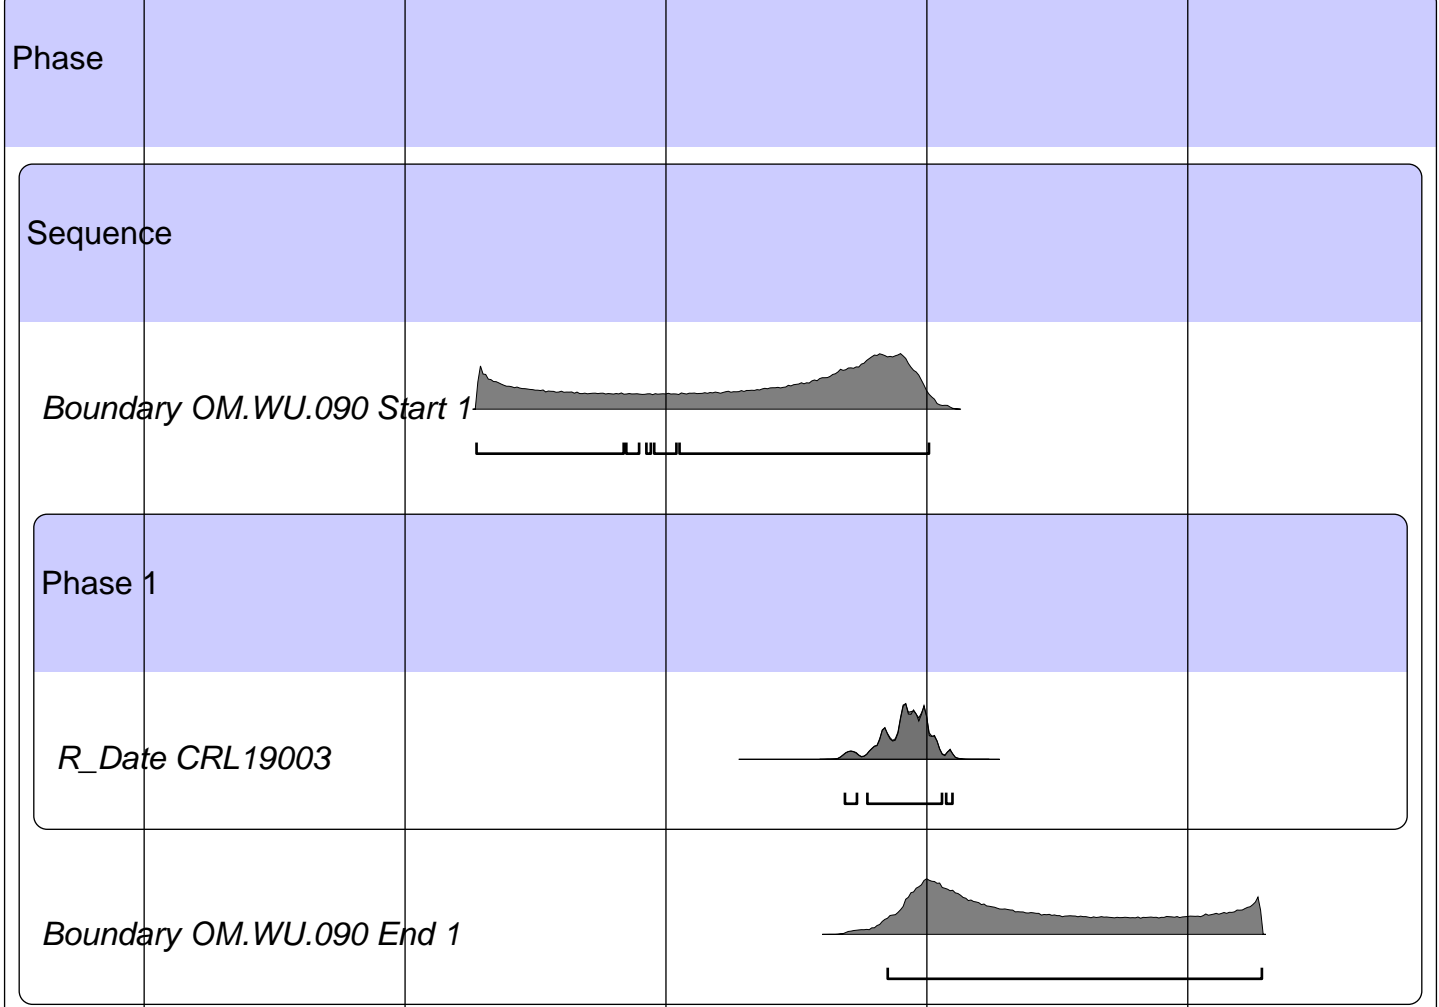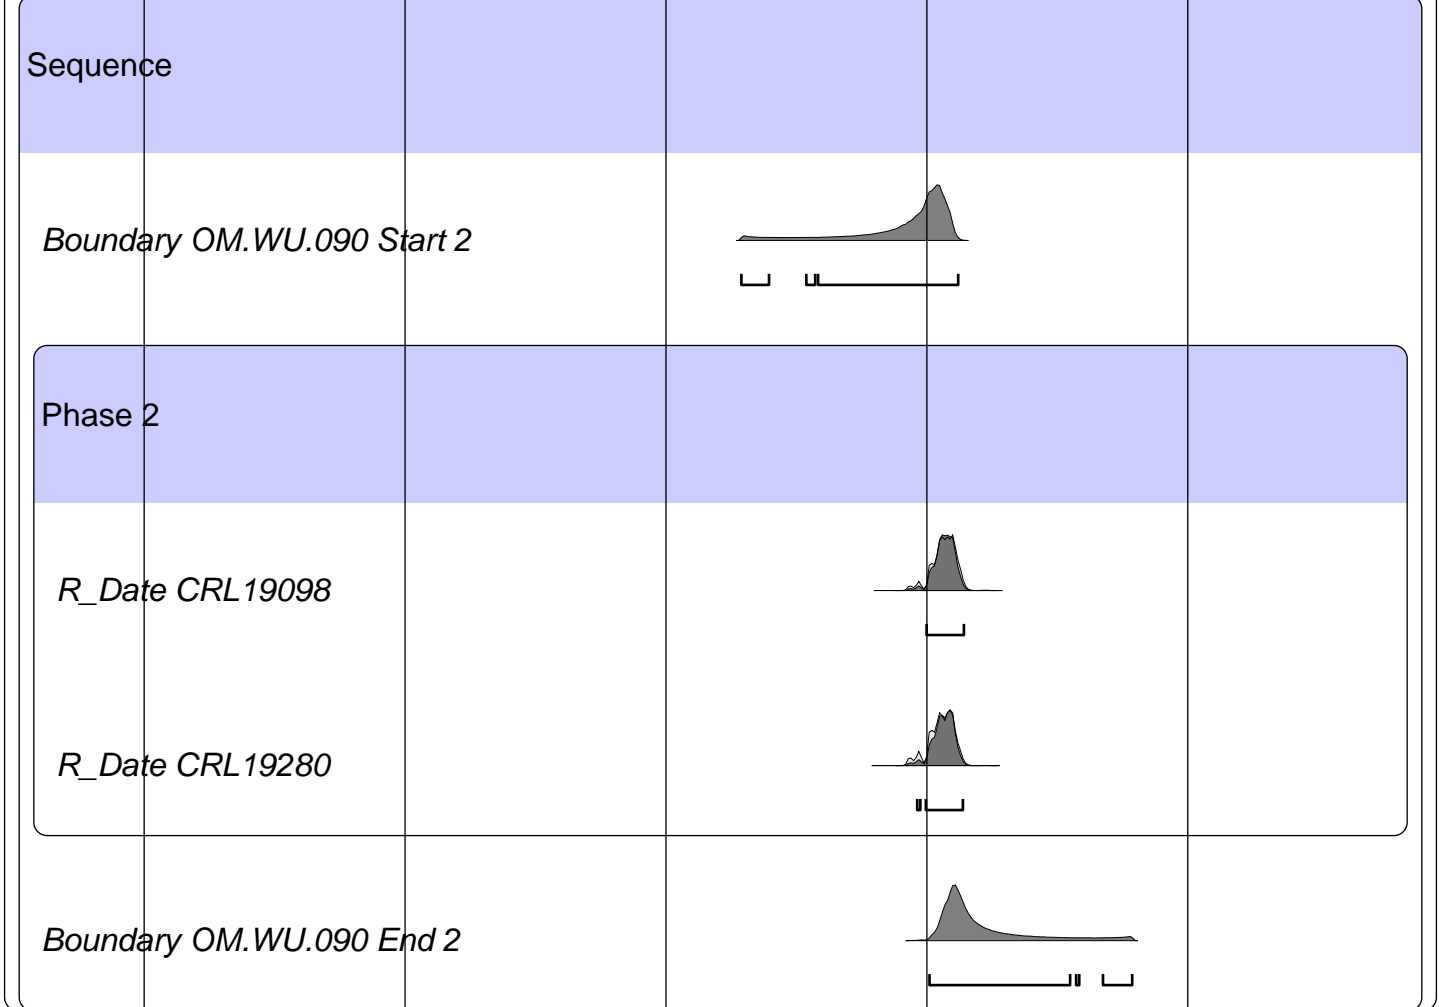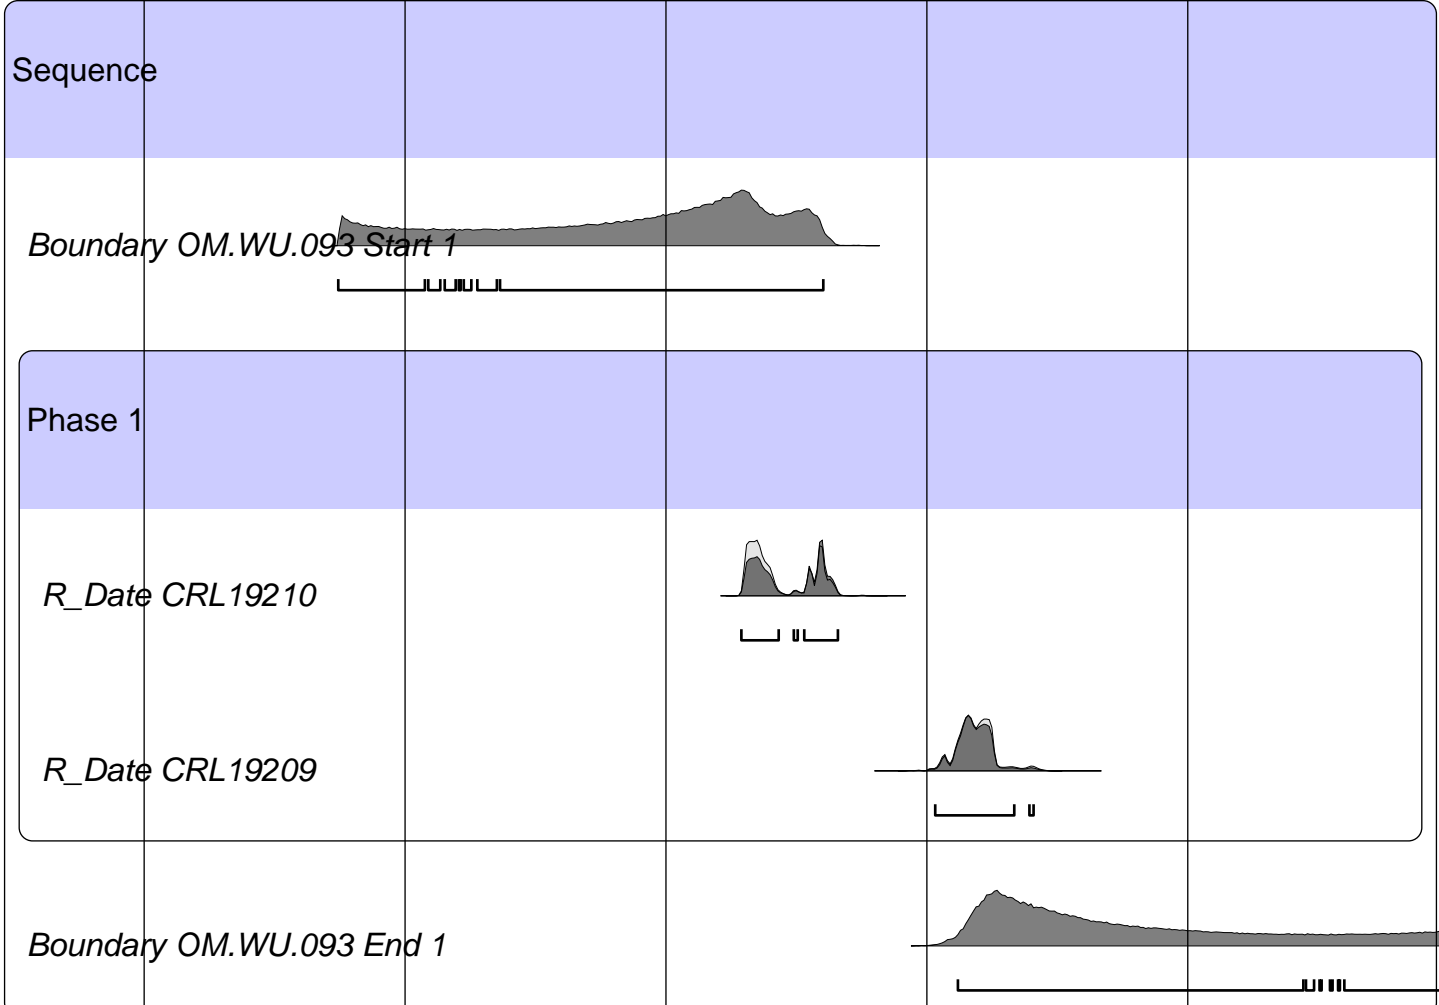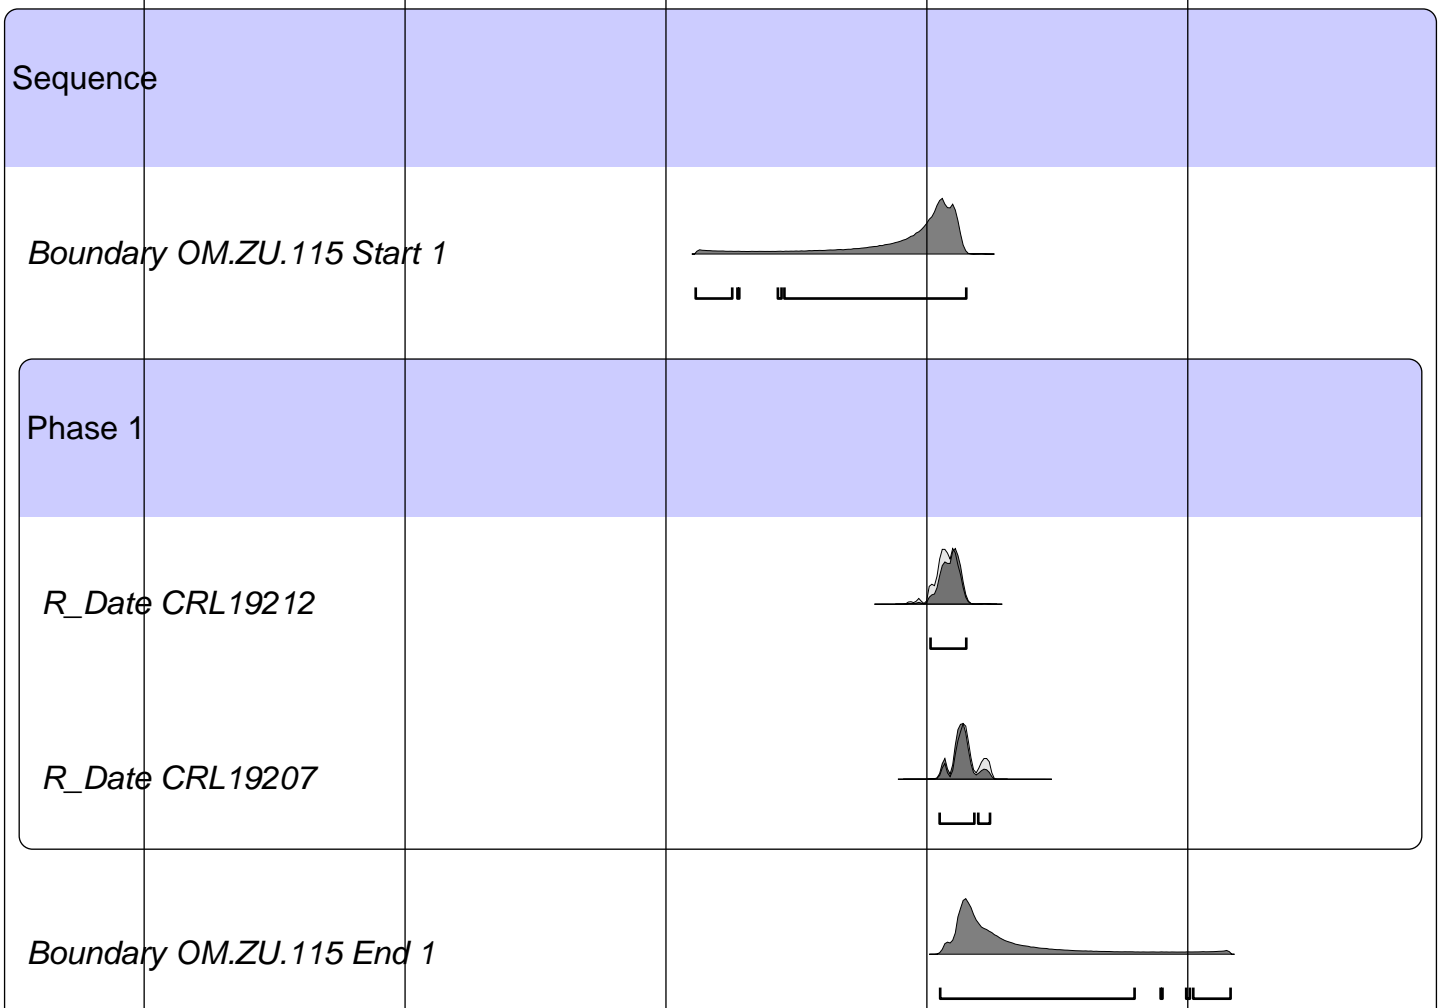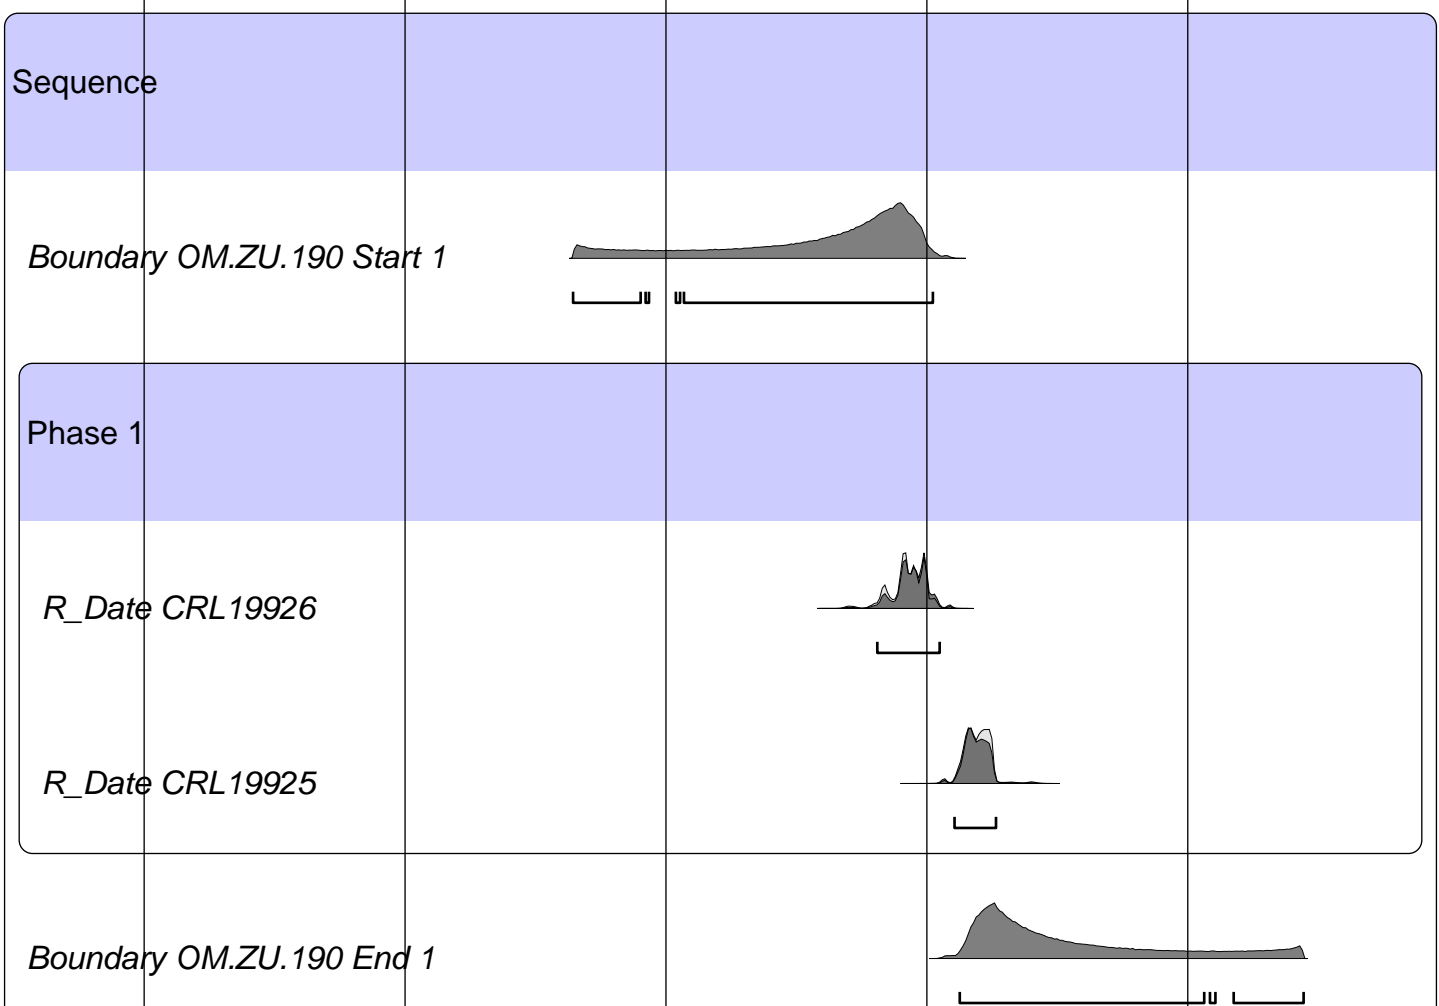

1500 1000 500 1BC/1AD 501 1001

Modelled date (BC/AD)

Supplement: Supplementary file 1 [file S003382222000123Xsupp004.pdf]
